# Supplementary material
Source: Royal Society of Chemistry journal article supplement (doi:10.1039/d5np00072f)
Supplement: d5np00072f1.pdf [file d5np00072f1.pdf]

## Advancing Natural Product R&D&I: Guide for Compliance with Responsible Research and Innovation, Ethics, Nagoya Protocol, and Intellectual Property Protection

Susana P. Gaudêncio,<sup>\*ab</sup> Belma Kalamujić Stroil,<sup>c</sup> Lucie Novoveska,<sup>d</sup> Céline Rebours,<sup>e</sup> and Xenia T. Schneider<sup>f</sup>

---

<sup>a</sup> Associate Laboratory i4HB, Institute for Health and Bioeconomy, NOVA School of Science and Technology, NOVA University of Lisbon, 2819-516 Caparica, Portugal.

<sup>b</sup> UCIBIO—Applied Molecular Biosciences Unit, NOVA School of Science and Technology, NOVA University of Lisbon, 2819-516 Caparica, Portugal.

<sup>c</sup> University of Sarajevo-Institute for Genetic Engineering and Biotechnology, 71000 Sarajevo, Bosnia and Herzegovina

<sup>d</sup> UK Centre for Ecology and Hydrology, Bush Estate, Penicuik, EH26 0QB, UK.

<sup>e</sup> Møreforskning AS, 6021 Ålesund, Norway

<sup>f</sup> XPRO Consulting Limited, Strovolos 2021, Cyprus.

† Corresponding author: s.gaudencio@fct.unl.pt.

**Table S1.** European codes of conduct, guidelines, and legal instruments related to research ethics and integrity.

| Title                                                                                 | Scope and Purpose                                                                                     | Key Principles / Focus Areas                                                                                                                                    | Target Audience                                                                                                                                                                                     | Legal Status / Type                       | Link                                      |
|---------------------------------------------------------------------------------------|-------------------------------------------------------------------------------------------------------|-----------------------------------------------------------------------------------------------------------------------------------------------------------------|-----------------------------------------------------------------------------------------------------------------------------------------------------------------------------------------------------|-------------------------------------------|-------------------------------------------|
| <b>European Code of Conduct for Research Integrity</b> (2021)                         | Promotes responsible research practices and integrity across the EU                                   | Reliability, honesty, respect, accountability; guidance on good research practices and handling misconduct                                                      | Researchers, institutions, research funders                                                                                                                                                         | Non-binding, but widely adopted guideline | <a href="#">European Code of Conduct</a>  |
| <b>Global Code of Conduct for Research in Resource-Poor Settings</b> (2018)           | Ensures equitable and ethical research in low- and middle-income countries; prevents ethics dumping   | Fairness, respect, care, honesty; emphasis on equitable partnerships and local relevance                                                                        | Researchers working internationally, especially in LMICs                                                                                                                                            | Non-binding, endorsed by EU Horizon 2020  | <a href="#">Global Code of Conduct</a>    |
| <b>EU Guidance on Potential Misuse of Research</b> (ENERI, 2018)                      | Addresses dual-use concerns and risks of research being misapplied (e.g., in weapons or surveillance) | Dual-use, misuse potential, biosecurity, risk-benefit assessment, researcher responsibility                                                                     | H2020 applicants, ethics reviewers, institutions.                                                                                                                                                   | Non-binding, advisory document            | <a href="#">Guidance on Misuse</a>        |
| <b>Directive 2010/63/EU on the Protection of Animals Used for Scientific Purposes</b> | Regulates use of animals in scientific procedures, emphasizing ethical treatment and animal welfare   | 3Rs (Replacement, Reduction, Refinement), ethical reviews, licenses, inspections                                                                                | Researchers using animals, lab facilities, ethics committees                                                                                                                                        | Legally binding EU directive              | <a href="#">Directive 2010/63/EU</a>      |
| <b>Directive 98/44/EC on the Legal Protection of Biotechnological Inventions</b>      | Regulates ethical boundaries and patentability of biotechnological inventions                         | Patent protection, human genome, exclusions (e.g., cloning, human embryos)                                                                                      | Researchers, biotech companies, legal experts                                                                                                                                                       | Legally binding EU directive              | <a href="#">Directive 98/44/EC</a>        |
| <b>Horizon 2020 Guidance on Ethics Self-Assessment</b> (2018)                         | Provides practical steps to identify and address ethics issues in H2020 proposals                     | Human subjects, privacy, data, environment, animals, dual-use, compliance obligations                                                                           | H2020 applicants, coordinators, ethics advisors                                                                                                                                                     | Non-binding, guidance document            | <a href="#">H2020 Ethics Guidance</a>     |
| <b>EU Grants Guidance on Ethics Self-Assessment</b> (2021)                            | Provides practical steps to identify and address ethics issues in European Grant proposals            | Human subjects, personal data, animals, Non-EU countries, environment, health and safety, artificial intelligence, and misuse of results compliance obligations | EU Programmes: Horizon Europe (HE), Digital Europe (DEP) and European Defence Fund (EDF) and other programmes that may require an ethics review to authorise funding (AMIF, ISF, EMFAF, EU4H, etc.) | Non-binding, guidance document            | <a href="#">EU Grants Ethics Guidance</a> |

**Table S2.** National codes of conduct and research ethics or integrity guidelines.

| Country            | Title                                                              | Focus / Scope                                                           | Type                              | Link                 |
|--------------------|--------------------------------------------------------------------|-------------------------------------------------------------------------|-----------------------------------|----------------------|
| <b>Austria</b>     | Guidelines for Good Scientific Practice                            | Principles for scientific integrity and responsible conduct in research | National guidelines               | <a href="#">Link</a> |
| <b>Belgium</b>     | Codes of Ethics for Scientific Research                            | Ethical standards for Belgian research institutions                     | National codes                    | <a href="#">Link</a> |
| <b>Italy</b>       | Guidelines for Research Integrity (CNR)                            | Ethical rules and scientific misconduct prevention                      | National institutional guidelines | <a href="#">Link</a> |
| <b>Denmark</b>     | Danish Code of Conduct for Research Integrity                      | National framework for responsible research                             | National code                     | <a href="#">Link</a> |
| <b>Denmark</b>     | Historical Guidelines for Good Scientific Practice                 | Earlier Danish guidance on scientific integrity                         | Historical guideline              | <a href="#">Link</a> |
| <b>Estonia</b>     | Code of Ethics for Estonian Scientists                             | Ethical norms for researchers                                           | National ethics code              | <a href="#">Link</a> |
| <b>Estonia</b>     | Estonian Code of Conduct for Research Integrity                    | Principles and values for responsible research                          | National integrity code           | <a href="#">Link</a> |
| <b>Finland</b>     | Guidelines on the Responsible Conduct of Research                  | Detailed procedures and handling of misconduct                          | National guideline                | <a href="#">Link</a> |
| <b>France</b>      | Guide to Integrity and Responsibility in Research Practices (CNRS) | Research integrity, transparency, and responsibility                    | Institutional guide               | <a href="#">Link</a> |
| <b>Germany</b>     | Safeguarding Good Scientific Practice (DFG)                        | Good practices and procedures in research                               | National framework                | <a href="#">Link</a> |
| <b>Netherlands</b> | Netherlands Code of Conduct for Research Integrity                 | Research principles and ethical standards                               | National code                     | <a href="#">Link</a> |
| <b>Norway</b>      | Guidelines for Research Ethics in Science and Technology           | Ethics in research across STEM disciplines                              | National ethics guidelines        | <a href="#">Link</a> |
| <b>Poland</b>      | Recommendations for Good Scientific Research Practices             | Research quality and integrity recommendations                          | National recommendation           | <a href="#">Link</a> |
| <b>Spain</b>       | Code of Good Scientific Practices (CSIC)                           | Standards for scientific integrity                                      | Institutional code                | <a href="#">Link</a> |

**Table S3.** Roles and Responsibilities of Parties, Authorities, Providers, and Users in the ABS Process under the Nagoya Protocol.

| <b>Step</b>                                             | <b>Party (State)</b>                                                     | <b>CNA</b>                                                             | <b>Provider<br/>(incl. IPLCs where applicable)</b>                                                   | <b>User</b>                                                                       |
|---------------------------------------------------------|--------------------------------------------------------------------------|------------------------------------------------------------------------|------------------------------------------------------------------------------------------------------|-----------------------------------------------------------------------------------|
| <b>1. Identification &amp; preliminary consultation</b> | Maintain ABS framework and ABSCH information                             | —                                                                      | —                                                                                                    | Identify GR/TK, consult ABSCH requirements                                        |
| <b>2. Contact with national authorities</b>             | Designate NFP and NCA                                                    | Provide guidance, receive access request                               | —                                                                                                    | Contact NFP, submit access request to NCA                                         |
| <b>3. Granting of PIC</b>                               | Exercise sovereign rights over GR                                        | Formalize and grant PIC on behalf of Party                             | Grant PIC and/or approval & involvement (where required by law)                                      | Request PIC, comply with conditions                                               |
| <b>4. Redaction of MAT</b>                              | Enable legal certainty for MAT                                           | —                                                                      | Negotiate and agree on MAT                                                                           | Negotiate and sign MAT                                                            |
| <b>5. Access authorization (MAA, where applicable)</b>  | Establish national access procedures, Decide whether to use ABSCH system | Issue permit / access authorization, Upload permit to ABSCH (optional) | Authorize access via State mechanism                                                                 | Receive authorization, comply<br>Check existence, retain IRCC/permit              |
| <b>6. Collection, documentation and transport</b>       | Allow national practice on MTAs                                          | Issue or validate MTA (if used)                                        | Ensure MAT conditions respected                                                                      | Collect/receive GR, document samples for traceability<br>Sign and comply with MTA |
| <b>7. Utilization and ongoing compliance</b>            | Implement user-side compliance laws                                      | Receive due diligence declarations (EU, etc.)                          | —                                                                                                    | Use within MAT scope, submit due diligence declarations where required            |
| <b>8. Monitoring through checkpoints</b>                | Monitor utilization within jurisdiction                                  | Operate checkpoints, verify compliance                                 | —                                                                                                    | Demonstrate legal access and benefit sharing                                      |
| <b>9. Benefit sharing &amp; commercialization</b>       | Ensure benefit-sharing compliance<br>Allocate benefits nationally        | —                                                                      | Receive benefits per MAT, Distribute benefits to IPLCs, conservation, sustainability (if applicable) | Share benefits, notify commercialization                                          |
| <b>10. Onward transfer to User C</b>                    | Enforce transfer rules                                                   | Verify compliance if needed                                            | Authorize onward transfer via MAT                                                                    | Ensure MAT allows transfer, pass obligations. If prohibited, no transfer          |
| <b>11. Compliance, enforcement &amp; cooperation</b>    | Cooperate internationally, enforce laws                                  | Investigate non-compliance                                             | Request assistance if misuse suspected                                                               | Provide documentation, cooperate                                                  |

**Table S4.** Intellectual Property Rights protection tools for Genetic Resources and Traditional Knowledge.

| <b>IPR Tool</b>                  | <b>Suitable For</b>                        | <b>Limitations</b>                                                      |
|----------------------------------|--------------------------------------------|-------------------------------------------------------------------------|
| <i>Sui Generis</i> Laws          | TK, GR                                     | Varies by country, limited international harmonization                  |
| <b>Geographical Indications</b>  | Region-specific goods (crafts, food)       | Requires strong regional link                                           |
| <b>Trademarks/Certifications</b> | Community-made products, quality assurance | Does not protect underlying knowledge                                   |
| <b>Defensive Publication</b>     | Prevents misappropriation via patent       | Does not grant ownership rights                                         |
| <b>ABS Agreements</b>            | Sharing benefits from resource use         | Needs effective enforcement                                             |
| <b>Copyright</b>                 | Cultural expressions (songs, stories)      | Limited by collective/anonymous authorship                              |
| <b>Patent</b>                    | Bioprospecting outcomes                    | Strict novelty, inventiveness and industrial applicability requirements |

**Table 5.** Major patent offices.

| <b>Country/Region</b>  | <b>Patent Office</b>                                                         | <b>Website</b>                                                     |
|------------------------|------------------------------------------------------------------------------|--------------------------------------------------------------------|
| <b>United States</b>   | United States Patent and Trademark Office (USPTO)                            | <a href="http://www.uspto.gov">www.uspto.gov</a>                   |
| <b>China</b>           | China National Intellectual Property Administration (CNIPA)                  | <a href="http://www.cnipa.gov.cn">www.cnipa.gov.cn</a>             |
| <b>Japan</b>           | Japan Patent Office (JPO)                                                    | <a href="http://www.jpo.go.jp">www.jpo.go.jp</a>                   |
| <b>European States</b> | European Patent Office (EPO)                                                 | <a href="http://www.epo.org">www.epo.org</a>                       |
| <b>India</b>           | Office of the Controller General of Patents, Designs and Trademarks (CGPDTM) | <a href="http://www.ipindia.gov.in">www.ipindia.gov.in</a>         |
| <b>South Korea</b>     | Korean Intellectual Property Office (KIPO)                                   | <a href="http://www.kipo.go.kr">www.kipo.go.kr</a>                 |
| <b>Germany</b>         | German Patent and Trademark Office (DPMA)                                    | <a href="http://www.dpma.de">www.dpma.de</a>                       |
| <b>United Kingdom</b>  | UK Intellectual Property Office (UKIPO)                                      | <a href="http://www.gov.uk/ipo">www.gov.uk/ipo</a>                 |
| <b>Brazil</b>          | National Institute of Industrial Property (INPI)                             | <a href="http://www.gov.br/inpi">www.gov.br/inpi</a>               |
| <b>Canada</b>          | Canadian Intellectual Property Office (CIPO)                                 | <a href="http://www.ic.gc.ca/cipo">www.ic.gc.ca/cipo</a>           |
| <b>Australia</b>       | IP Australia                                                                 | <a href="http://www.ipaustralia.gov.au">www.ipaustralia.gov.au</a> |

**Table S6.** Patent systems overview.

| <b>Level</b>         | <b>System/Office</b>                | <b>Covers</b>           |
|----------------------|-------------------------------------|-------------------------|
| <b>International</b> | WIPO/PCT                            | 150+ countries          |
| <b>Regional</b>      | EPO, ARIPO, OAPI, EAPO              | Europe, Africa, Eurasia |
| <b>National</b>      | USPTO, CNIPA, NIPO, INPI, JPO, etc. | Individual countries    |
